# Supplementary material
Source: publisher figshare collection journal article supplement (https://geolsoc.figshare.com/ndownloader/files/5424032)
Supplement: Supplementary file 1 [file 5424032]

Table for U-Pb geochronologic analyses
							Isotope ratios						Apparent ages (Ma)
Analysis	U	206Pb	U/Th	206Pb*	±	207Pb*	±	206Pb*	±	error	206Pb*	±	207Pb*	±	206Pb*	±	Best age	±	Conc
	(ppm)	204Pb		207Pb*	(%)	235U*	(%)	238U	(%)	corr.	238U*	(Ma)	235U	(Ma)	207Pb*	(Ma)	(Ma)	(Ma)	(%)
SM11-006-1	31	26986	0.9	9.0675	1.7	4.8571	2.1	0.3194	1.3	0.61	1786.9	20.0	1794.8	17.7	1804.1	30.2	1804.1	30.2	99.0
SM11-006-2	123	193993	1.0	8.8589	0.4	5.2312	4.4	0.3361	4.4	1.00	1867.9	71.4	1857.7	37.7	1846.3	7.2	1846.3	7.2	101.2
SM11-006-3	248	363350	1.8	8.9297	0.2	5.0936	1.2	0.3299	1.2	0.98	1837.8	19.4	1835.0	10.5	1831.9	3.9	1831.9	3.9	100.3
SM11-006-4	120	113229	1.9	6.6866	0.2	9.0027	2.1	0.4366	2.1	0.99	2335.4	40.7	2338.3	19.1	2340.8	3.9	2340.8	3.9	99.8
SM11-006-6	52	50395	0.5	7.9764	0.6	6.3481	1.1	0.3672	0.9	0.85	2016.4	16.4	2025.1	9.8	2034.0	10.5	2034.0	10.5	99.1
SM11-006-7	273	158285	1.3	11.6769	0.5	2.3858	3.3	0.2021	3.3	0.99	1186.3	35.9	1238.4	24.0	1330.0	9.8	1330.0	9.8	89.2
SM11-006-8	49	86115	1.1	5.6917	0.7	12.1280	1.3	0.5006	1.1	0.86	2616.5	24.6	2614.4	12.4	2612.6	11.2	2612.6	11.2	100.1
SM11-006-9	389	534690	4.4	8.6075	0.7	5.3258	2.4	0.3325	2.3	0.95	1850.4	36.9	1873.0	20.5	1898.2	12.8	1898.2	12.8	97.5
SM11-006-10	231	288119	2.6	9.2982	0.3	4.6938	0.8	0.3165	0.8	0.95	1772.8	12.0	1766.1	6.8	1758.3	4.8	1758.3	4.8	100.8
SM11-006-11	746	648577	10.5	10.2250	0.1	3.6881	0.9	0.2735	0.8	0.99	1558.6	11.6	1568.8	6.8	1582.6	2.4	1582.6	2.4	98.5
SM11-006-12	99	242407	1.5	8.7675	0.5	5.2166	1.3	0.3317	1.2	0.91	1846.7	18.6	1855.3	10.9	1865.0	9.8	1865.0	9.8	99.0
SM11-006-13	74	189317	4.8	3.0620	0.3	33.3422	2.3	0.7405	2.3	0.99	3572.2	62.8	3590.8	22.7	3601.1	4.0	3601.1	4.0	99.2
SM11-006-14	372	395082	15.0	8.3405	0.2	5.8524	2.4	0.3540	2.4	1.00	1953.8	40.7	1954.2	21.1	1954.7	4.3	1954.7	4.3	100.0
SM11-006-15	157	190280	2.0	7.2953	0.3	7.6187	2.6	0.4031	2.6	0.99	2183.4	47.6	2187.1	23.2	2190.5	4.7	2190.5	4.7	99.7
SM11-006-17	171	86695	1.1	9.2509	0.5	4.9264	1.2	0.3305	1.1	0.91	1841.0	17.8	1806.8	10.3	1767.6	9.1	1767.6	9.1	104.2
SM11-006-18	102	85615	1.3	11.6513	0.7	2.7193	2.6	0.2298	2.5	0.96	1333.4	30.2	1333.8	19.3	1334.3	13.6	1334.3	13.6	99.9
SM11-006-21	174	169234	1.9	9.2711	0.4	4.7521	1.0	0.3195	1.0	0.93	1787.5	15.1	1776.5	8.7	1763.6	6.7	1763.6	6.7	101.4
SM11-006-24	179	332461	4.1	8.4552	0.6	5.5117	4.8	0.3380	4.8	0.99	1877.0	78.0	1902.4	41.5	1930.2	11.1	1930.2	11.1	97.2
SM11-006-25	339	203453	3.1	13.9072	0.4	1.5996	1.9	0.1613	1.9	0.98	964.2	16.8	970.0	11.9	983.3	7.1	983.3	7.1	98.1
SM11-006-26	464	782544	1.9	9.4346	0.1	4.4188	1.8	0.3024	1.8	1.00	1703.0	26.9	1715.9	14.9	1731.6	2.3	1731.6	2.3	98.4
SM11-006-27	272	384059	3.0	8.7700	0.1	5.2348	0.7	0.3330	0.7	0.98	1852.7	10.9	1858.3	5.9	1864.5	2.6	1864.5	2.6	99.4
SM11-006-28	64	55123	1.1	9.0167	0.9	4.8665	1.9	0.3182	1.6	0.87	1781.2	25.3	1796.5	15.7	1814.3	16.4	1814.3	16.4	98.2
SM11-006-29	260	687726	3.7	9.2669	0.2	4.6364	1.8	0.3116	1.8	0.99	1748.6	26.9	1755.8	14.8	1764.4	3.7	1764.4	3.7	99.1
SM11-006-30	113	188546	2.3	6.0734	0.3	10.6874	2.1	0.4708	2.1	0.99	2486.9	43.7	2496.3	19.8	2504.0	5.0	2504.0	5.0	99.3
SM11-006-32	106	126380	2.8	7.7797	0.3	6.7639	1.6	0.3816	1.6	0.98	2084.0	28.5	2081.0	14.4	2078.1	5.2	2078.1	5.2	100.3
SM11-006-33	147	74508	74.2	14.3816	1.2	1.4469	2.0	0.1509	1.6	0.80	906.1	13.4	908.6	11.9	914.6	24.8	914.6	24.8	99.1
SM11-006-34	120	119949	1.9	9.2836	0.6	4.7901	1.8	0.3225	1.7	0.93	1802.0	26.0	1783.2	14.9	1761.1	11.7	1761.1	11.7	102.3
SM11-006-36	142	214615	13.1	4.9878	0.4	14.4728	2.8	0.5235	2.7	0.99	2714.2	60.4	2781.2	26.1	2830.2	5.9	2830.2	5.9	95.9
SM11-006-38	251	302820	3.9	14.1577	1.0	1.5398	2.6	0.1581	2.3	0.92	946.3	20.6	946.4	15.8	946.8	21.1	946.8	21.1	99.9
SM11-006-39	234	476542	1.7	5.9579	0.2	10.9890	1.8	0.4748	1.8	1.00	2504.8	36.8	2522.2	16.6	2536.3	2.9	2536.3	2.9	98.8
SM11-006-40	150	250140	2.4	8.6827	0.3	5.3669	1.2	0.3380	1.2	0.98	1876.9	19.5	1879.6	10.5	1882.5	4.7	1882.5	4.7	99.7
SM11-006-41	313	518023	4.8	9.1283	0.2	4.7544	1.4	0.3148	1.4	0.99	1764.1	21.8	1776.9	11.9	1791.9	3.4	1791.9	3.4	98.4
SM11-006-42	247	193066	1.5	9.5843	0.3	4.4712	6.5	0.3108	6.5	1.00	1744.7	98.9	1725.6	53.8	1702.6	5.4	1702.6	5.4	102.5
SM11-006-43	115	165031	0.5	9.3588	0.4	4.5325	1.1	0.3076	1.1	0.95	1729.1	16.5	1736.9	9.5	1746.4	6.5	1746.4	6.5	99.0
SM11-006-44	268	265704	2.5	9.3105	0.3	4.6989	1.1	0.3173	1.1	0.97	1776.5	17.0	1767.0	9.4	1755.8	4.7	1755.8	4.7	101.2
SM11-006-45	180	192170	1.5	9.8502	0.3	3.9481	2.1	0.2821	2.1	0.99	1601.7	29.6	1623.6	17.1	1652.1	5.7	1652.1	5.7	96.9
SM11-006-46	503	412284	2.6	11.0310	0.8	3.1169	2.3	0.2494	2.2	0.94	1435.2	28.2	1436.9	17.9	1439.3	14.9	1439.3	14.9	99.7
SM11-006-47	347	573120	6.4	9.1261	0.2	4.8162	1.5	0.3188	1.5	0.99	1783.8	23.6	1787.7	12.8	1792.3	3.3	1792.3	3.3	99.5
SM11-006-48	311	304388	18.5	3.9015	1.1	16.0366	2.3	0.4538	2.1	0.88	2412.0	41.7	2879.0	22.4	3224.2	17.2	3224.2	17.2	74.8
SM11-006-49	187	395183	2.9	7.2771	0.2	7.6032	0.4	0.4013	0.4	0.91	2174.9	7.6	2185.2	4.0	2194.9	3.2	2194.9	3.2	99.1
SM11-006-50	203	304712	2.0	9.3683	0.2	4.6164	0.7	0.3137	0.7	0.97	1758.7	10.1	1752.2	5.6	1744.5	2.9	1744.5	2.9	100.8
SM11-006-51	250	94864	1.3	16.1254	1.2	0.8097	3.3	0.0947	3.1	0.93	583.2	17.3	602.3	15.1	674.6	25.3	583.2	17.3	86.5
SM11-006-52	391	119813	14.0	17.1224	0.8	0.7363	2.1	0.0914	2.0	0.93	564.0	10.7	560.2	9.1	544.9	16.9	564.0	10.7	103.5
SM11-006-54	129	138307	2.1	7.4051	0.8	7.6715	1.8	0.4120	1.7	0.91	2224.1	31.5	2193.3	16.6	2164.5	13.6	2164.5	13.6	102.8
SM11-006-55	83	48497	0.5	17.2676	5.6	0.6635	5.8	0.0831	1.1	0.20	514.6	5.6	516.8	23.3	526.5	123.9	514.6	5.6	97.7
SM11-006-56	158	160925	1.2	6.1649	0.2	10.4820	1.5	0.4687	1.5	0.99	2477.7	30.8	2478.3	14.0	2478.8	3.2	2478.8	3.2	100.0
SM11-006-58	485	150722	14.7	17.3743	0.7	0.6708	2.2	0.0845	2.0	0.94	523.1	10.2	521.2	8.8	512.9	16.2	523.1	10.2	102.0
SM11-006-61	119	65527	0.6	17.5116	2.3	0.6796	3.0	0.0863	1.9	0.64	533.7	9.7	526.6	12.3	495.6	50.8	533.7	9.7	107.7
SM11-006-62	145	35715	0.8	16.4529	8.5	0.7141	9.8	0.0852	4.8	0.49	527.2	24.4	547.2	41.4	631.5	183.6	527.2	24.4	83.5
SM11-006-63	237	267488	2.6	7.8226	0.2	6.5502	1.2	0.3716	1.2	0.98	2037.0	21.1	2052.7	10.8	2068.4	3.7	2068.4	3.7	98.5
SM11-006-64	141	433357	1.3	5.9657	0.2	11.3453	4.4	0.4909	4.4	1.00	2574.5	93.1	2551.9	41.0	2534.1	2.6	2534.1	2.6	101.6
SM11-006-65	190	442750	1.9	8.7717	0.3	5.3538	2.6	0.3406	2.6	0.99	1889.6	42.7	1877.5	22.4	1864.2	5.6	1864.2	5.6	101.4
SM11-006-66	525	87699	4.3	16.9266	0.7	0.7183	2.0	0.0882	1.9	0.95	544.7	10.1	549.6	8.7	570.0	14.4	544.7	10.1	95.6
SM11-006-67	203	145047	2.2	12.6157	1.2	2.1961	7.6	0.2009	7.5	0.99	1180.4	80.8	1179.8	53.0	1178.8	23.8	1178.8	23.8	100.1
SM11-006-68	110	334853	1.0	8.7368	0.4	5.4923	1.0	0.3480	0.9	0.90	1925.1	15.3	1899.4	8.8	1871.4	8.1	1871.4	8.1	102.9
SM11-006-69	908	530024	10.4	15.4507	0.8	1.0792	3.0	0.1209	2.9	0.97	735.9	20.1	743.2	15.8	765.3	15.8	735.9	20.1	96.2
SM11-006-70	280	294075	1.1	8.4461	0.2	5.7474	1.6	0.3521	1.6	0.99	1944.4	26.1	1938.5	13.6	1932.2	3.8	1932.2	3.8	100.6
SM11-006-71	268	272363	1.5	9.9186	0.1	4.0885	1.3	0.2941	1.3	1.00	1662.0	19.2	1652.0	10.7	1639.3	1.7	1639.3	1.7	101.4
SM11-006-72	190	263190	2.1	9.2216	0.2	4.7940	3.1	0.3206	3.1	1.00	1792.8	49.0	1783.9	26.4	1773.4	4.1	1773.4	4.1	101.1
SM11-006-73	129	202241	1.1	6.0096	0.2	10.8270	1.0	0.4719	0.9	0.98	2491.9	19.5	2508.4	9.0	2521.8	3.6	2521.8	3.6	98.8
SM11-006-74	192	178369	4.2	6.8057	0.1	8.2572	3.0	0.4076	3.0	1.00	2203.8	55.4	2259.6	26.9	2310.6	2.3	2310.6	2.3	95.4
SM11-006-75	553	114925	4.4	17.0463	0.6	0.7459	1.1	0.0922	0.9	0.84	568.6	5.1	565.8	4.8	554.6	13.3	568.6	5.1	102.5
SM11-006-76	288	124186	3.4	8.8176	0.2	5.0418	2.5	0.3224	2.5	1.00	1801.6	38.6	1826.4	20.9	1854.7	4.3	1854.7	4.3	97.1
SM11-006-77	94	390309	1.5	5.1967	0.5	14.3915	2.7	0.5424	2.6	0.98	2793.6	59.4	2775.9	25.3	2763.0	7.6	2763.0	7.6	101.1
SM11-006-78	187	326177	1.3	6.1787	0.2	10.1826	0.7	0.4563	0.6	0.97	2423.2	12.8	2451.5	6.1	2475.0	2.7	2475.0	2.7	97.9
SM11-006-79	267	176998	2.5	13.9820	0.7	1.6054	1.0	0.1628	0.8	0.75	972.3	7.0	972.3	6.5	972.3	14.1	972.3	14.1	100.0
SM11-006-80	325	469378	7.1	9.1336	0.1	4.8392	0.7	0.3206	0.7	0.99	1792.5	10.3	1791.7	5.6	1790.9	1.9	1790.9	1.9	100.1
SM11-006-81	191	92293	1.6	10.1076	0.5	3.6535	2.3	0.2678	2.2	0.97	1529.8	30.0	1561.3	18.0	1604.1	9.5	1604.1	9.5	95.4
SM11-006-82	143	219540	2.0	10.8515	0.7	3.2144	1.4	0.2530	1.2	0.86	1453.8	15.3	1460.6	10.6	1470.5	13.2	1470.5	13.2	98.9
SM11-006-83	239	246716	1.7	6.6786	0.2	9.0079	3.8	0.4363	3.8	1.00	2334.1	74.5	2338.8	34.8	2342.9	3.6	2342.9	3.6	99.6
SM11-006-84	87	149160	1.0	6.0350	0.2	10.8499	0.6	0.4749	0.6	0.92	2505.0	12.3	2510.4	6.0	2514.7	4.1	2514.7	4.1	99.6
SM11-006-85	160	228918	0.8	5.9936	0.1	10.8233	0.7	0.4705	0.7	0.98	2485.7	13.4	2508.1	6.2	2526.2	2.3	2526.2	2.3	98.4
SM11-006-86	134	32275	0.8	17.0140	2.1	0.7646	3.5	0.0944	2.8	0.80	581.2	15.6	576.7	15.4	558.8	45.2	581.2	15.6	104.0
SM11-006-87	241	657667	1.7	7.3003	0.2	7.6330	1.0	0.4041	1.0	0.99	2188.1	19.0	2188.8	9.3	2189.4	2.9	2189.4	2.9	99.9
SM11-006-88	183	112318	1.7	11.9809	1.0	2.4874	1.7	0.2161	1.4	0.83	1261.4	16.5	1268.4	12.5	1280.1	18.8	1280.1	18.8	98.5
SM11-006-89	190	193772	2.3	11.1666	0.5	2.8851	1.4	0.2337	1.3	0.95	1353.6	16.1	1378.0	10.5	1416.0	8.7	1416.0	8.7	95.6
SM11-006-90	122	190837	1.1	6.0141	0.2	11.0715	1.6	0.4829	1.6	0.99	2540.0	33.1	2529.2	14.8	2520.5	3.3	2520.5	3.3	100.8
SM11-006-91	132	418496	1.4	4.8917	0.2	15.9199	1.8	0.5648	1.8	1.00	2886.5	42.0	2872.0	17.3	2861.9	2.9	2861.9	2.9	100.9
SM11-006-92	168	204039	1.9	10.5920	0.5	3.4004	1.6	0.2612	1.5	0.95	1496.1	19.9	1504.5	12.2	1516.3	8.8	1516.3	8.8	98.7
SM11-006-93	127	9123	0.6	17.2180	4.2	0.6688	4.3	0.0835	1.0	0.23	517.1	4.9	520.0	17.6	532.8	92.4	517.1	4.9	97.1
SM11-006-94	304	753994	1.9	8.1700	0.1	6.0914	1.6	0.3609	1.5	1.00	1986.6	26.5	1989.0	13.5	1991.5	1.9	1991.5	1.9	99.8
SM11-006-95	278	359478	1.2	9.9724	0.3	4.0273	1.4	0.2913	1.4	0.98	1647.9	19.8	1639.7	11.3	1629.2	5.5	1629.2	5.5	101.1
SM11-006-96	79	44285	2.3	13.8327	1.9	1.5820	2.4	0.1587	1.6	0.65	949.6	14.0	963.1	15.2	994.2	37.8	994.2	37.8	95.5
SM11-006-98	159	238760	1.2	6.1817	0.3	10.1663	0.8	0.4558	0.7	0.92	2421.0	14.7	2450.0	7.3	2474.2	5.3	2474.2	5.3	97.8
SM11-006-99	202	151672	1.5	11.9765	1.6	2.4478	6.2	0.2126	5.9	0.97	1242.8	67.1	1256.8	44.4	1280.8	31.3	1280.8	31.3	97.0
SM11-006-100	316	221108	4.3	9.1112	0.3	4.7888	1.3	0.3164	1.2	0.98	1772.3	19.3	1782.9	10.7	1795.3	4.6	1795.3	4.6	98.7
